# Supplementary material for: Efficacy and tolerability of the new autoinjected suspension of exenatide once weekly versus exenatide twice daily in patients with type 2 diabetes
Source: PubMed Central journal article supplement — Diabetes Obes Metab. 2017 Aug 22;20(1):165–72. doi: 10.1111/dom.13056 (PMC5724491; doi:10.1111/dom.13056), 2017-08-22
Supplement: DOM-20-165-s001.pdf [file DOM-20-165-s001.pdf]

## **Supporting Information**

### **Analysis populations**

The modified intention-to-treat (mITT) population—the primary analysis population containing all randomized patients who received at least one dose of study drug—was used for efficacy and pharmacodynamic analyses. The treated population consisted of all patients who received at least one dose of study drug, including patients who received study medication but were not randomized. The treated population was used for safety analyses. The week 28-evaluable population consisted of all patients in the mITT population who completed the study through week 24 (the visit before the week 28 visit). The meal test-evaluable population consisted of patients in the mITT population who participated in the meal test, consumed at least 75% of the standardized meal, and did not have missing 2-hour postprandial glucose measurements at baseline, day 1, and week 16. Finally, the pharmacokinetics-evaluable population comprised all patients in the mITT population who had adequate and reliable pharmacokinetics data.

### **Models used for analysis**

For the mixed-effects model for repeated measures (MMRM), treatment, diabetes management method at screening, renal function, visit week, treatment-by-visit interaction, and glycated hemoglobin (HbA1c) stratum ( $<9.0\%$  or  $\geq 9.0\%$  [ $<75$  or  $\geq 75$  mmol/mol]) at screening were included as fixed factors, patient was included as a random effect, and the baseline value of the parameter analyzed was included as a covariate. A treatment-by-sex, treatment-by-age ( $<65$  and  $\geq 65$  years), or treatment-by-race interaction was explored separately with an MMRM, with additional covariates of subgroups (sex, age, or race), treatment by subgroup, week by subgroup,

and treatment by week by subgroup. The Cochran-Mantel-Haenszel test was stratified by HbA1c stratum at screening, diabetes management method, and renal function.

### **Compliance**

Compliance was measured as the percentage of injections received relative to the number of planned injections and was high for both groups (mean  $\pm$  standard deviation: 90.0  $\pm$  22.0% with exenatide once-weekly suspension by autoinjector [QWS-AI]; 83.7  $\pm$  29.6% with exenatide twice daily [BID]) during the 28-week controlled period. Likewise, when compliance was measured during the time between the first and last dose (rather than across the study period), the mean  $\pm$  standard deviation percentage of study medication injections received compared with study medication injections planned was 98.6  $\pm$  5.3% for exenatide QWS-AI and 96.4  $\pm$  8.3% for exenatide BID.

**TABLE S1** Changes in  $iAUC_{(0-5h)}$  postprandial serum insulin and triglycerides (meal test-evaluable population)

|                                                          | <b>Exenatide QWS-AI<br/>(n=31)</b> | <b>Exenatide BID<br/>(n=37)</b> |
|----------------------------------------------------------|------------------------------------|---------------------------------|
| <b>Insulin <math>iAUC_{(0-5h)}</math>, mU.h/L</b>        |                                    |                                 |
| Baseline, mean $\pm$ SE                                  | 162.0 $\pm$ 26.4                   | 127.1 $\pm$ 11.6                |
| LSM $\pm$ SE change from baseline to week 16             | +24.0 $\pm$ 28.2                   | -59.9 $\pm$ 31.6                |
| LSM $\pm$ SE difference vs exenatide BID                 | 83.9 $\pm$ 33.2                    | —                               |
| p value                                                  | 0.0142                             | —                               |
| <b>Triglyceride <math>iAUC_{(0-5h)}</math>, mmol.h/L</b> |                                    |                                 |
| Baseline, mean $\pm$ SE                                  | 1.7 $\pm$ 0.3                      | 1.7 $\pm$ 0.3                   |
| LSM $\pm$ SE change from baseline to week 16             | -0.1 $\pm$ 0.4                     | -1.2 $\pm$ 0.4                  |
| LSM $\pm$ SE difference vs exenatide BID                 | 1.0 $\pm$ 0.5                      | —                               |
| p value                                                  | 0.0293                             | —                               |

BID, twice daily;  $iAUC_{(0-5h)}$ , incremental area under the curve from 0–5 hours; LSM, least-squares mean; QWS-AI, once-weekly suspension by autoinjector; SE, standard error.

**TABLE S2** Changes in cardiovascular risk factors (modified intention-to-treat population)

|                                            | <b>Exenatide QWS-AI<br/>(n=229)</b> | <b>Exenatide BID<br/>(n=146)</b> |
|--------------------------------------------|-------------------------------------|----------------------------------|
| Systolic BP, mm Hg                         |                                     |                                  |
| Baseline                                   | 129.8 ± 1.0                         | 130.3 ± 1.2                      |
| Change from baseline to week 28            | -0.8 ± 1.1                          | -1.6 ± 1.4                       |
| Diastolic BP, mm Hg                        |                                     |                                  |
| Baseline                                   | 78.2 ± 0.6                          | 80.0 ± 0.7                       |
| Change from baseline to week 28            | +0.2 ± 0.6*                         | -1.9 ± 0.8                       |
| Heart rate, beats/min                      |                                     |                                  |
| Baseline, mean ± SD                        | 75.1 ± 11.1                         | 74.0 ± 10.4                      |
| Change from baseline to week 28, mean ± SD | +1.9 ± 9.4                          | +1.6 ± 8.5                       |
| Total cholesterol, mmol/L                  |                                     |                                  |
| Baseline                                   | 4.7 ± 0.09                          | 4.5 ± 0.09                       |
| Change from baseline to week 28            | -0.1 ± 0.06                         | -0.1 ± 0.07                      |
| 95% CI                                     | -0.2; 0.0                           | -0.2; +0.1                       |
| HDL cholesterol, mmol/L                    |                                     |                                  |
| Baseline                                   | 1.2 ± 0.02                          | 1.1 ± 0.03                       |
| Change from baseline to week 28            | 0.0 ± 0.02                          | 0.0 ± 0.02                       |
| 95% CI                                     | 0.0; 0.0                            | 0.0; +0.1                        |

|                                                      | <b>Exenatide QWS-AI<br/>(n=229)</b> | <b>Exenatide BID<br/>(n=146)</b> |
|------------------------------------------------------|-------------------------------------|----------------------------------|
| <b>LDL cholesterol, mmol/L</b>                       |                                     |                                  |
| Baseline                                             | 2.6 ± 0.07                          | 2.5 ± 0.08                       |
| Change from baseline to week 28                      | -0.2 ± 0.05                         | -0.1 ± 0.06                      |
| 95% CI                                               | -0.2; -0.1                          | -0.2; 0.0                        |
| <b>Triglycerides, mmol/L</b>                         |                                     |                                  |
| Baseline, geometric mean ± SE                        | 1.9 ± 0.06                          | 1.8 ± 0.07                       |
| Ratio of week 28 to baseline, geometric LS mean ± SE | 1.0 ± 0.03                          | 1.0 ± 0.04                       |
| Geometric 95% CI                                     | 1.0; 1.1                            | 0.9; 1.1                         |

Data are LS mean ± SE unless otherwise stated.

BID, twice daily; BP, blood pressure; CI, confidence interval; HDL, high-density lipoprotein; LDL, low-density lipoprotein; LS, least-squares; QWS-AI, once-weekly suspension by autoinjector; SD, standard deviation; SE, standard error.

\*p<0.05 vs exenatide BID.

**TABLE S3** Change in HbA1c from baseline to week 28 by treatment-emergent antibody status  
(modified intention-to-treat population)

| <b>Antibody status</b>  | <b>Exenatide QWS-AI<br/>(n=229)</b> | <b>Exenatide BID<br/>(n=146)</b> |
|-------------------------|-------------------------------------|----------------------------------|
| Negative                |                                     |                                  |
| n                       | 101                                 | 104                              |
| LOCF change in HbA1c, % | -1.39 ± 1.11                        | -1.07 ± 1.08                     |
| Low-positive (<625)     |                                     |                                  |
| n                       | 94                                  | 33                               |
| LOCF change in HbA1c, % | -1.48 ± 1.25                        | -0.93 ± 1.44                     |
| High-positive (≥625)    |                                     |                                  |
| n                       | 31                                  | 6                                |
| LOCF change in HbA1c, % | -0.74 ± 1.33                        | 0.05 ± 0.47                      |

Data are mean ± standard deviation and are based on the number of patients with available antibody status and HbA1c results.

BID, twice daily; HbA1c, glycated hemoglobin; LOCF, last observation carried forward; QWS-AI, once-weekly suspension by autoinjector.

**FIGURE S1** Change in (A) HbA1c, (B) FPG, and (C) body weight over time for patients in the modified intention-to-treat population based on SU use. Differences are exenatide QWS-AI – exenatide BID (95% confidence interval). BID, twice daily; FPG, fasting plasma glucose; HbA1c, glycated hemoglobin; QWS-AI, once-weekly suspension by autoinjector; SE, standard error; SU, sulfonylurea.

**A**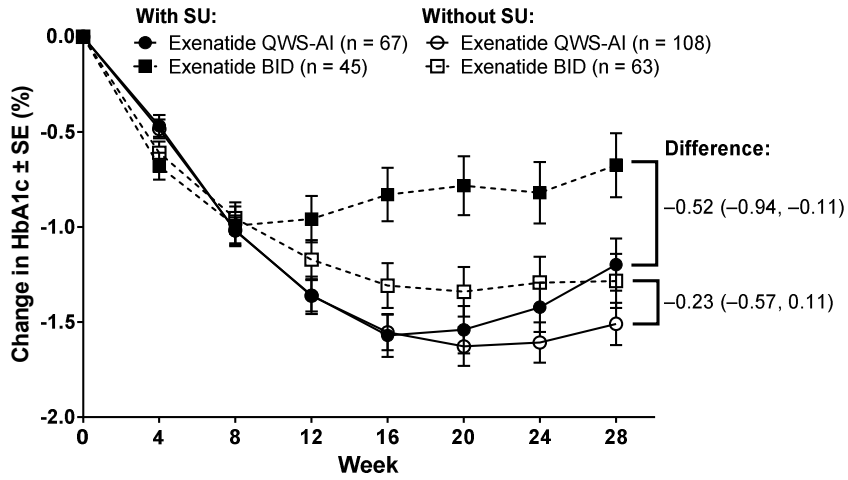**B**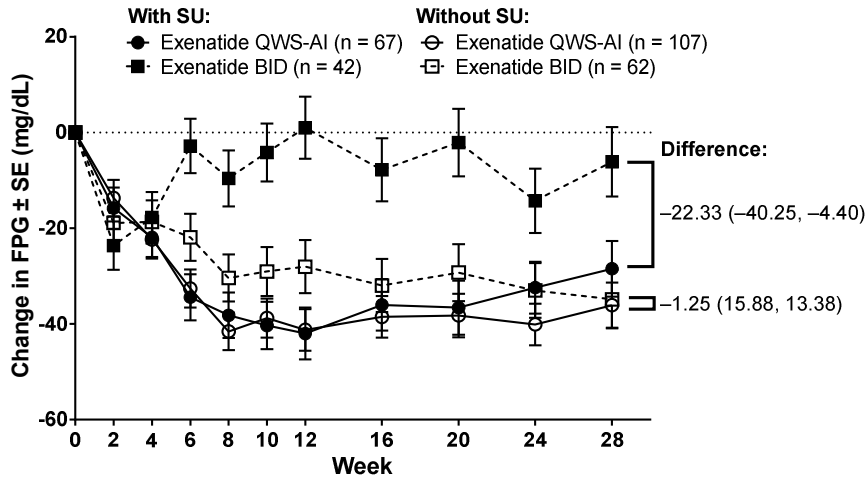**C**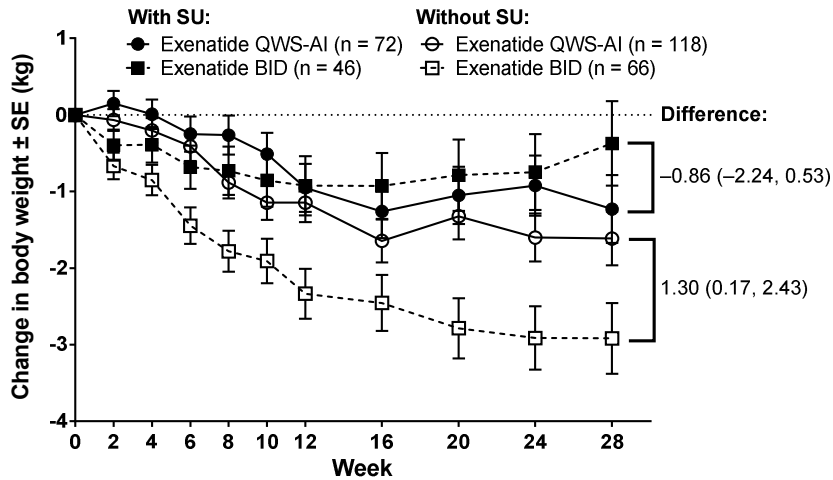



## List of Study Investigators

**Michael Adams**, Mark Johnston, Fares Arguello (Murray, UT); **Andrew Ahmann**, Farahnaz Joarder, Kathryn Hanavan, Jessica Castle (Portland, OR); **Nabil Andrawis**, Ayman Megally, Julie Guiliani, Jyotsna Sandil, Rose LaGuardia, Rose Kelly (Manassas, VA); **Vanita Aroda**, Debra W. Thayer, Amy Loveland, Asqual Getaneh, Joanna Peterson, Milajurine Lindsay (Hyattsville, MD); **Samir Arora**, Elizabeth Finley, Heather Stasel, Holly Beisner, Vanessa Parks, Sridhar Guduri, Amy Whitson (Columbus, OH); **Timothy Bailey**, John Walsh, Laura Bedolla, Roya Jannesari, Trent Davis, Chandrasekhar Varma (Escondido, CA); **Rajat Bhushan**, Erika Flood, Ory Marrioneaux (Baton Rouge, LA); **Bradley Block**, Amy Nation, Craig Chase, Susan Smolen (Oviedo, FL); **Mark Benson**, Mary Schmoll, Ronald Stegemoller (Avon, IN); **Bruce Bowling**, Dawn Wendland, Duncan Sze-Tu, James Holler, Jane Aton-Partridge, Kimberly DeSantis, Lazarus Gehring, Lisa Forthofer, Suchet Patel, Susan Owen, Victor Elinoff, John Perry, Jonathan Harris (Endwell, NY); **Tami Renee Bruce**, Elizabeth Williams, Jennifer Kocour, Kelly Armstrong, Stacy Assan, Kristen Holmes, Lisa Hahn, Marla Coury, Theresa Ann Denison (Mesa, AZ and Tempe, AZ); **Leonard Chuck**, Angela Schneiderman, Frances Paula Delmendo, Lambert Chee, Helen Lee Stacey, Mark Christiansen, Richard Weinstein (Walnut Creek, CA); **Clinton Corder** (Oklahoma City, OK); **Michael E. Dever**, **Kevin Radbill**, Eva-Maria Heurich, Jennifer Fairbank, Craig Curtis, Judith Chalykoff, Sejal Sheth Patel (Orlando, FL); **Michael Dao**, Borady Ven, Daisy Lopez, David Wilson, Dinh Nguyen, Jeffrey Ho, Katie Van, Linda Tran, Ly Nguyen, Mai Tran, Marilyn Acosta, Quynh Mai, Tam Ngo (Garden Grove, CA); **Cara Hyman Dawson**, Tracy Chavez (Denver, CO); **Raymond De La Rosa**, Amanda Harp, Amanda VanCura, Dana Sowash Edwards, Jesse Wallace, Melissa Purvis, Paul Grumley, Sarah Van Meter, Susan Rames, Shanna Leslie, Erin Parrott (Paducah, KY); **Alan Forker**,

Kevin Bybee, Rebecca Allhiser, Sheryl Windsor, Yolanda Sanders (Kansas City, MO); **Neil Fraser**, Anju Dhar, Ashley Hopkins, David Gasparovich, Judy Perkins, Patricia Ivery, Jami Small, Janet Dubeck, John Bonema, John Joilat, Jonathan Michael Joliat, Joseph Skoney, Karen Lockwood, Kevin Nurmi, Mark Sinkoff, Michael Lumberg, Michael Simpson, Michelle Biddinger, Timothy Tinetti (Troy, MI); **Rajiv Dua**, Amy Madison, Arlene Posadas, Jennifer Emel, Joseph Gibbons, Kimberly Moore, Steven Geller (Elkridge, MD); **Carl Griffin**, Charles Bryant, Mark Fisher (Oklahoma City, OK); **Terence Hart** (Muscle Shoals, AL); **David Headley** (Port Gibson, MS); **Tami Helmer**, **Larry Kotek**, Kathryn Pyzdrowski, Lindsay DesLauriers, Larry Kotek (Edina, MN); **John Hoekstra**, James McKenney, Katie Carlton, Maria Fisher, Sarah Doolittle, William Jeter (Richmond, VA); **Donald Hurley**, Evelyn Waring, Geraldine Quiogue, Gina Keller, Kimberly Argabright, Kimberly Pugh, Laura Kinney, Lauren Holladay, Scott Landreth, Shannon Perry, Daniel Bates (Charleston, SC); **Dean Kereiakes**, Dain Wahl, Kimberly Bailey (Cincinnati, OH); **Boris Kerzner**, Dinah Christopher, M. Patricia Chance (Baltimore, MD); **Eric Klein**, Virginia Cannon (Olympia, WA); **David Larsen**, Brian Rasmussen, Randall Daynes, Timothy Young, Gene Fuller (Salt Lake City, UT); **Dennis Levinson**, Pranavkumar Shroff, Ahmed Azazuddin, Barbara Kenney (Chicago, IL); **Michael H. Link**, Aju George, Donna Lester, Maimoon Gafur Rahim, Oscar Piedad (Kissimmee, FL); **Robert Lipetz**, Darren Farnesi, Hanid Audish (Spring Valley, CA); **William Litchfield**, Kevin Dean Springer, Tomas Walker (Henderson, NV); **Richard Lorraine**, Jeffrey Mumie, Karen Maxwell, Mary Ann Karp (Harleysville, PA); **Barry Lubin**, Gail Beyer, Charles Goldman (Norfolk, VA); **Sashi Makam**, Daniel Coffey, Joseph Agyemang (New Windsor, NY); **Richard Mills**, Alissa Wulf, April Coyne, Erin Driscoll, Heather DuBose, Julie Zapkowski, Kathryn Rubino, Lori Ann Ueberroth, Michael Mikola, Susan Datta, Jessica Collins (Mount Pleasant,

SC); **Alexander Murray**, Amy Stevenson, James Kindl, Randall Lee Von Seggern, Sherri Frazier, William Harris IV (Greensboro, NC); **Lyle Myers**, Rachel Sparks, Wendell Miers (Lexington, KY); **Tushar Patel**, Nauka Patel (New Bedford, MA and Fall River, MA); **Sanford Plevin**, Allison Condit, Arthur Polin, Bridget Hester, Christina Krondahl, Deanna Bayne, Kelli Clark, Michael Lorello, Nicole Jacobs, Robert Kaszuba, Gary Goldstein, Karena Neri (New Port Richey, FL and Palm Harbor, FL); **Geri Eileen Poss**, Frank Rodriguez (San Antonio, TX); **Joe Pouzar Jr**, Adrienne Mucha, Linda Pouzar (Houston, TX); **John Pullman**, Erin Williams-Leber (Butte, MT); **Maria Raikhel**, Kristin Yoshiko Shimazaki, Susan Elftman, Harold Isenberg (Lomita, CA); **Bruce Rankin**, Craig Dean, John M. Hill, Rhonda Leitner, Teresa Logsdon, Melanie VanDemark, Alicia Cevera, Melissa Hodges, Amy L. Hill (DeLand, FL); **Ernie Riffer**, Annamarie Haught, Jennifer Burrows, Karin Hemmila, Kelly Cronin Vesely, Meli'sa Crawford, Vanessa Avila, Barabara A. Berry, Barbara C. Lipschitz (Phoenix, AZ and Tempe, AZ); **Michael F. Robinson**, Lauro Arteaga (Los Angeles, CA); **Jeffrey Rosen**, Julie Bielmeier, Scarleth R. Garcia, Harold M. Silberman, Ivan G. Carrasquilla, Merja T. Clegg (Coral Gables, FL); **Julio Rosenstock**, Leslie Anne Rooker Morris, Salomon Banarer, Wendy Kniffen (Dallas, TX); **Kenneth Rich**, Jaclyn Dolen, Jennifer Bohonos, John Duffy, Lorrie Bisesi, Maria Gonzalez, Mary Robinson, Nabil Charle Morcos, Veronica Avila (Santa Ana, CA); **Eli Roth**, Phillip M. Diller, Julie A. Mullen, Matthew Wenker, Gayle D. Hennekes, Janet L. Lung, Jeanne Piccola, Karen A. Freudemann, Margaret Baumann, Maria Loreto (Cincinnati, OH); **William Saway**, David Leichtling, Eileen Erskine, Lawrence Swink, Natasha Sandy, Peter Cheng, Saba Sheikh, Steven Noskow, Valerie Middleton, James Bellor Jr, Marshall Freedman (Columbia, MD); **Erich L. Schramm**, Lara Church, Rashmi Udayakumar-Schramm (Ponte Vedra, FL); **Michael Seep**, Enrique Mendez, William Nabours (Lake Charles, LA); **Cynthia Becher Strout**,

Carolyn Newton, Janis Caldwell, Mary Ellen Scesney, Patricia Knudsen, Rebecca Leask, Judy Ann Shillito, Mitchell Dean Feller (Mount Pleasant, SC); **Danny Sugimoto** (Chicago, IL); **Traci Turner**, Charles Harmon Pierce, Douglas Logan, Floyd Sallee, Evan Stein, Cheryle Webb (Cincinnati, OH); **Brij Vaid**, Abida Hamud-Socoro, Ali Shaikh, Bhugol Chandel, Kara Weekley, Neera Sharda, Vikrant Katoch (St. Louis, MO); **Mark Warren**, Genena Buck, Heather Helene McCullough, Kristie Barnes, Melissa Lewis, Regina Dodis, Richard Shultzaberger, Sarah Godwin (Greenville, NC); **Larry Watkins**, Barbara Porchia, Chrystal Johnson, Caroline May, Glenn Davis (Little Rock, AR); **Peter N. Weissman**, Martin Cohen, Martin Rothberg (Miami, FL); **Fred Whitehouse**, Davida Kruger, Arti Bhan (Detroit, MI); **Carol Wysham**, Alan Kelly, Jennifer Jones, Michael Wukelic, Stephen Willis (Spokane, WA).
